# Supplementary material
Source: MDPI journal article supplement (https://www.mdpi.com/2073-4441/15/13/2430)
Supplement: s1 [file s1]

# Halogenation of Pharmaceuticals Is an Impediment to Ready Biodegradability

Jürg Oliver Straub, Julien Le Roux and Damien Tedoldi

## Supporting Figures S1–S3

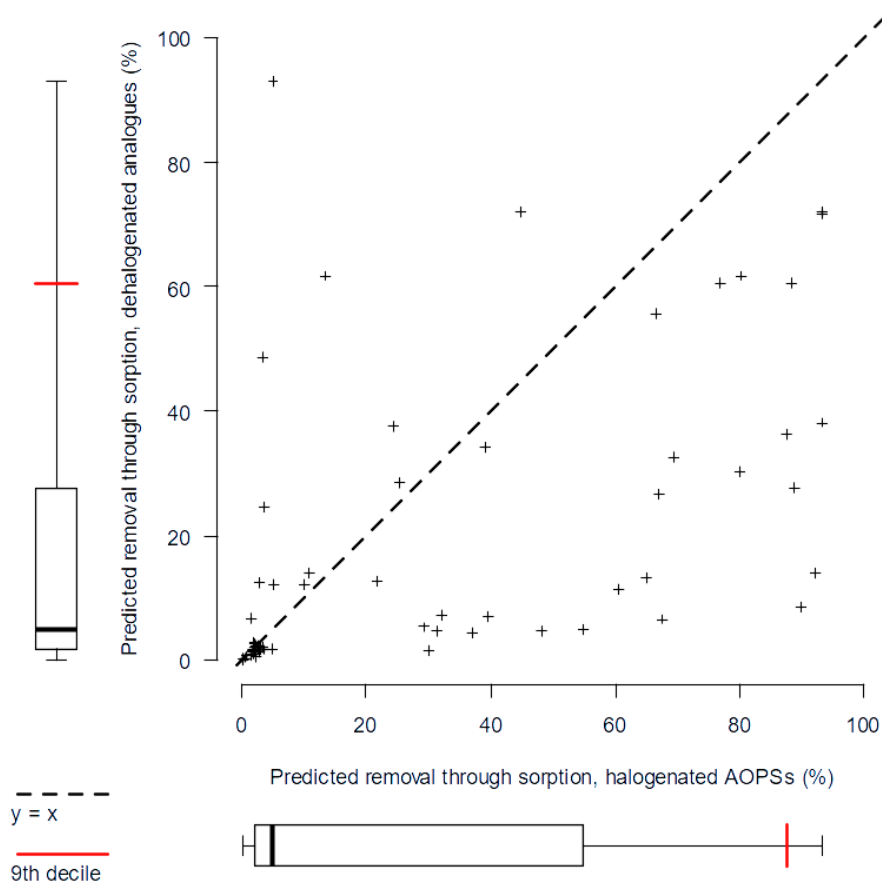

**Figure S1.** Graphical comparison of EPISuite-predicted wastewater treatment plant (WWTP) removal through sorption for the original halogenated active organic pharmaceutical substances (AOPSs) and their *in silico* dehalogenated analogues. Box = 25<sup>th</sup> to 75<sup>th</sup> percentiles, thick black line = median, whiskers = range; red line = 9<sup>th</sup> decile or 90<sup>th</sup> percentile.

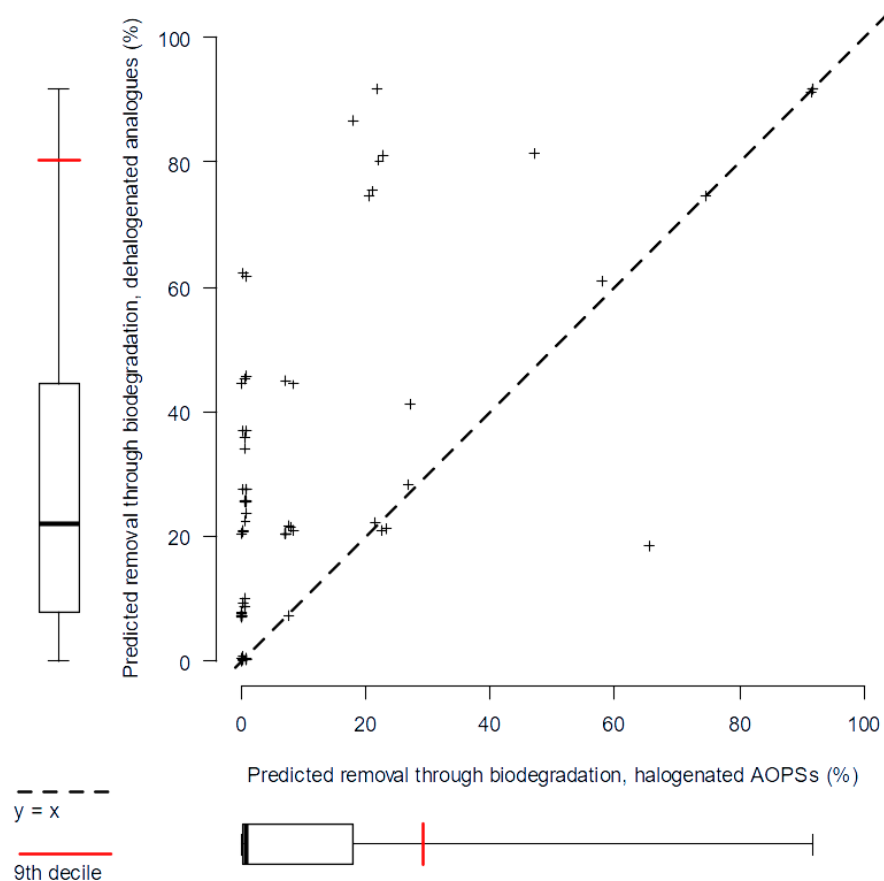

**Figure S2.** Graphical comparison of EPISuite-predicted wastewater treatment plant (WWTP) removal through biodegradation for the original halogenated active organic pharmaceutical substances (AOPs) and their *in silico* dehalogenated analogues. Box = 25<sup>th</sup> to 75<sup>th</sup> percentiles, thick black line = median, whiskers = range; red line = 9<sup>th</sup> decile or 90<sup>th</sup> percentile.

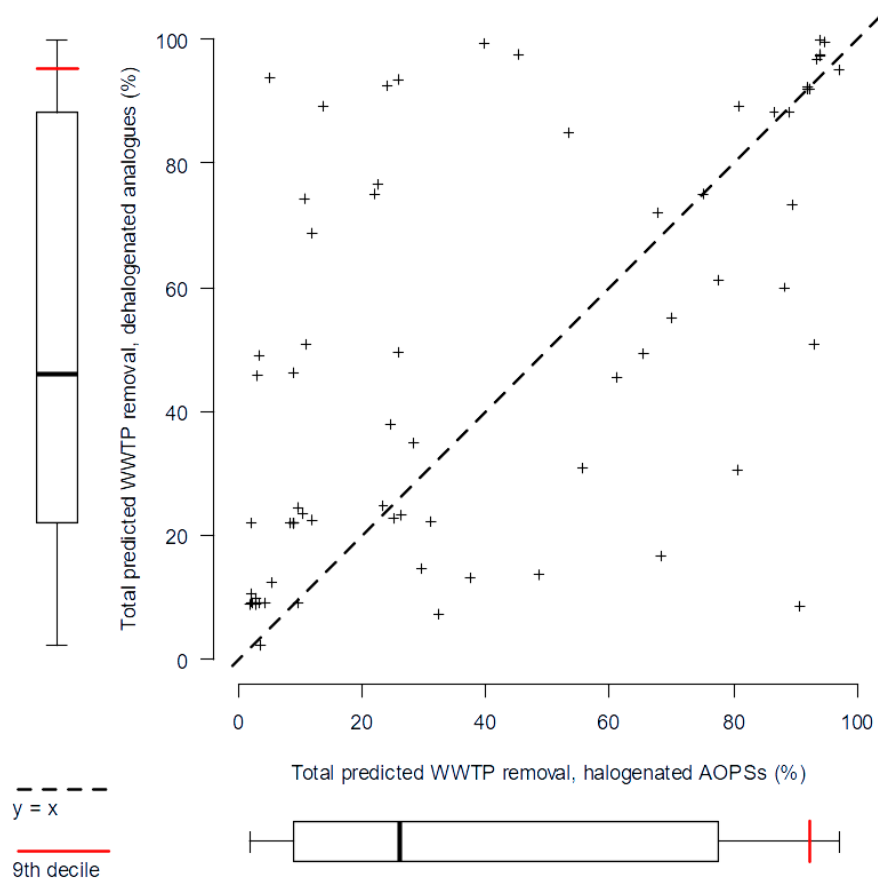

**Figure S3.** Graphical comparison of total EPISuite-predicted wastewater treatment plant (WWTP) removal for the original halogenated active organic pharmaceutical substances (AOPs) and their *in silico* dehalogenated analogues. Box = 25<sup>th</sup> to 75<sup>th</sup> percentiles, thick black line = median, whiskers = range; red line = 9<sup>th</sup> decile or 90<sup>th</sup> percentile.
